# Supplementary material
Source: Springer Nature journal article supplement (https://www.springermedizin.de/resource/supplementary/12947_2012_446_MOESM4_ESM.pdf/9555764)

**Panel D**  
**Log rank P=0.002**

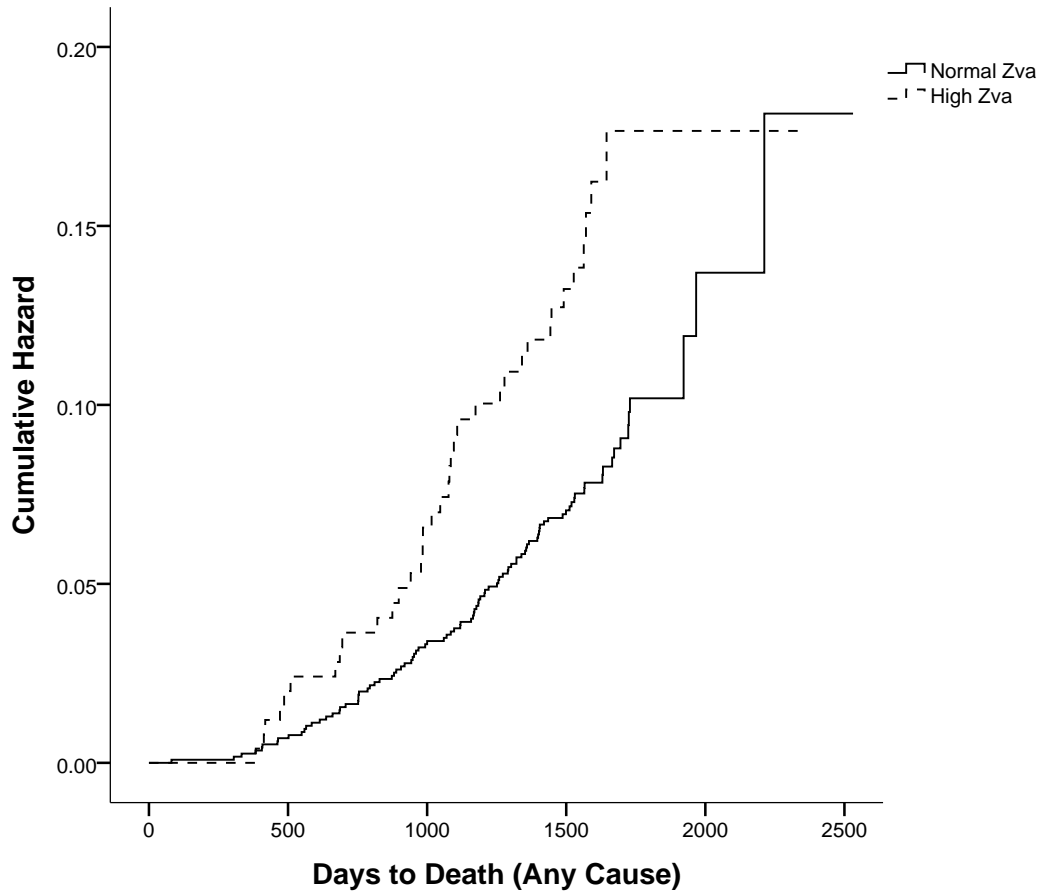

*Patients at risk*

|            |      |      |      |     |    |   |
|------------|------|------|------|-----|----|---|
| High Zva   | 252  | 247  | 235  | 193 | 12 | 0 |
| Normal Zva | 1166 | 1157 | 1126 | 928 | 56 | 1 |

Supplement: MOESM4 [file 9555764]
